# Supplementary material for: Tropospheric NO2 and O3 Response to COVID‐19 Lockdown Restrictions at the National and Urban Scales in Germany
Source: PubMed Central journal article supplement (PMC8667658; doi:10.1029/2021jd035440), 2021-09-27
Supplement: JGRD-126-e2021JD035440-s001.pdf [file JGRD-126-e2021JD035440-s001.pdf]

# Supporting Information for “Tropospheric NO<sub>2</sub> and O<sub>3</sub> response to COVID-19 lockdown restrictions at the national and urban scales in Germany”.

Vigneshkumar Balamurugan<sup>1</sup>, Jia Chen<sup>1</sup>, Zhen Qu<sup>2</sup>, Xiao Bi<sup>1</sup>, Johannes

Gensheimer<sup>1</sup>, Ankit Shekhar<sup>3</sup>, Shrutilipi Bhattacharjee<sup>4</sup>, Frank N. Keutsch<sup>2,5</sup>

<sup>1</sup>TUM Department of Electrical and Computer Engineering, Technische Universität München, Munich, Germany

<sup>2</sup>School of Engineering and Applied Science, Harvard University, Cambridge, Massachusetts, USA

<sup>3</sup>Department of Environmental Systems Science, ETH Zurich, Switzerland

<sup>4</sup>Department of Information Technology, National Institute of Technology Karnataka, Surathkal, India

<sup>5</sup>Department of Chemistry and Chemical Biology, Harvard University, Cambridge, Massachusetts, USA

## Contents of this file

1. Figures S1 to S13

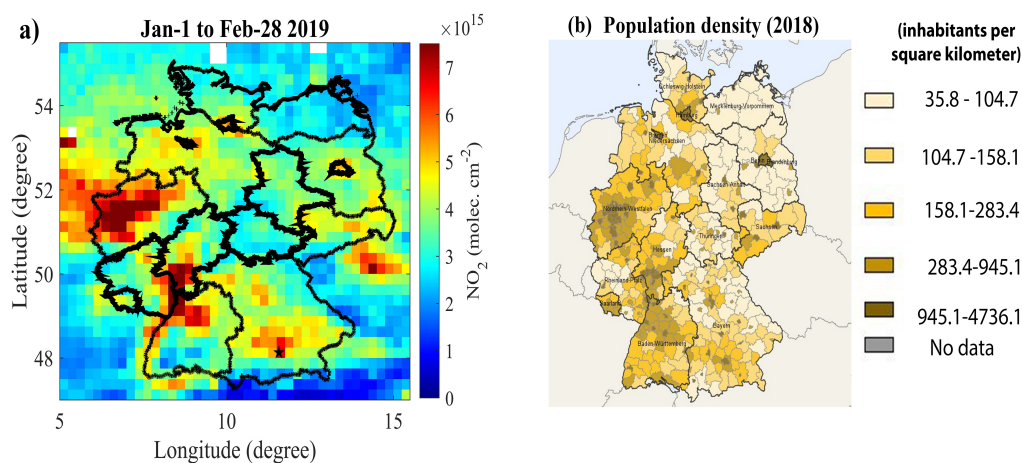

**Figure S1.** Spatial relationship between the TROPOMI  $\text{NO}_2$  concentration (mean  $\text{NO}_2$  concentration between January 1 and February 28, 2019) and population density. Population density map was retrieved from Statistisches Bundesamt [© Federal and State Statistical Offices, Germany, 2020].

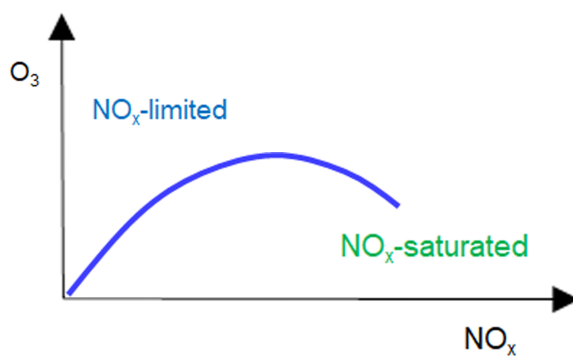

**Figure S2.** Graphical representation of  $\text{NO}_x$  saturated and  $\text{NO}_x$  limited ozone production regime.

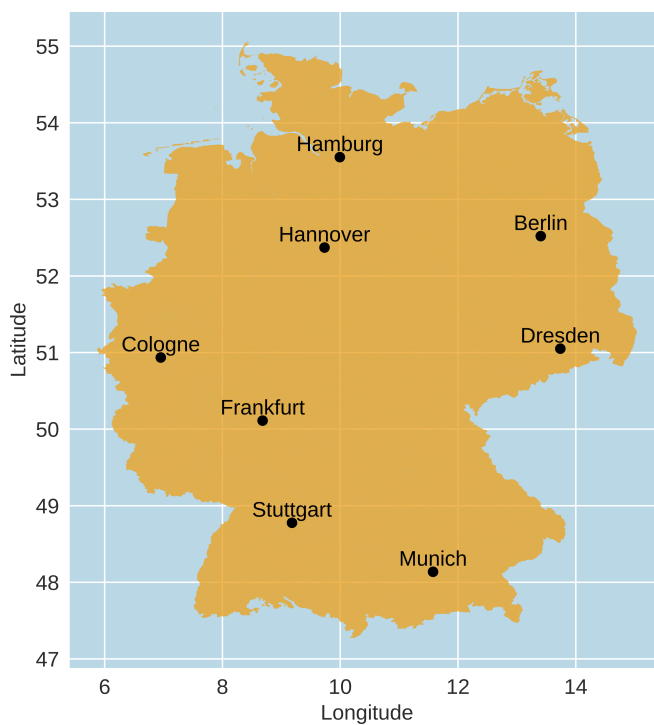

**Figure S3.** Visualization of the location of the urban study regions.

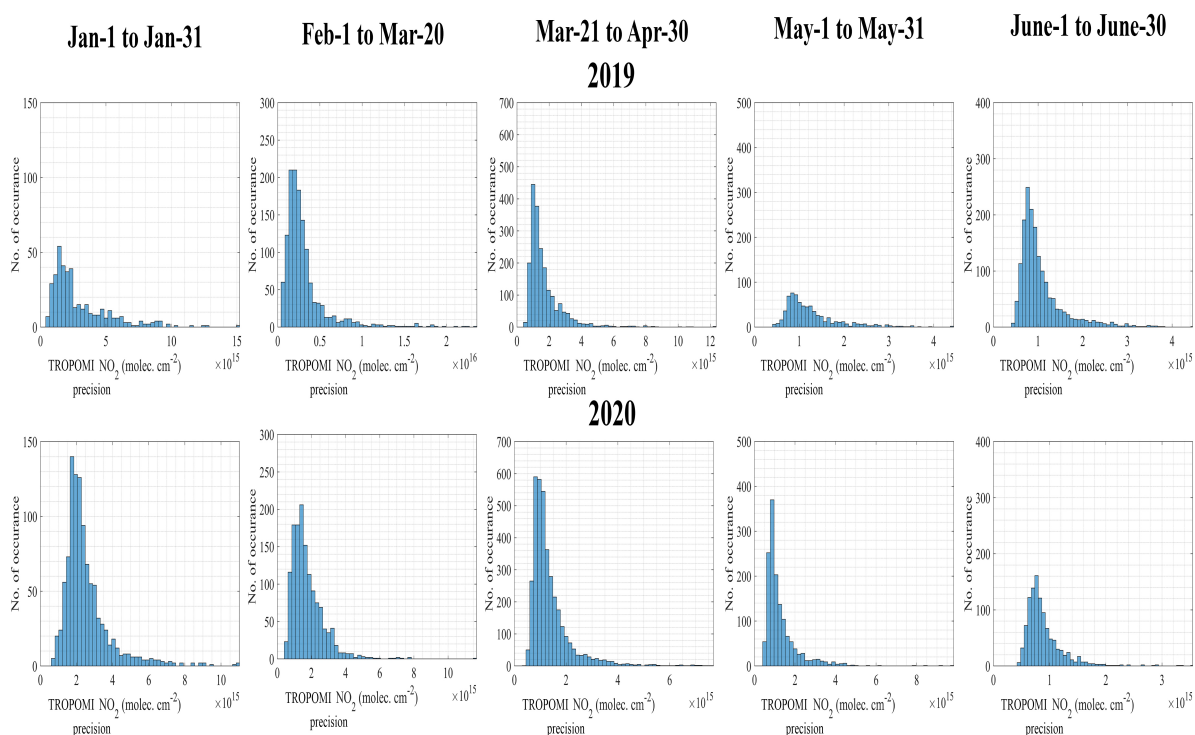

**Figure S4.** TROPOMI uncertainty distribution for different study period in 2019 (top) and 2020 (bottom).

August 16, 2021, 5:45pm

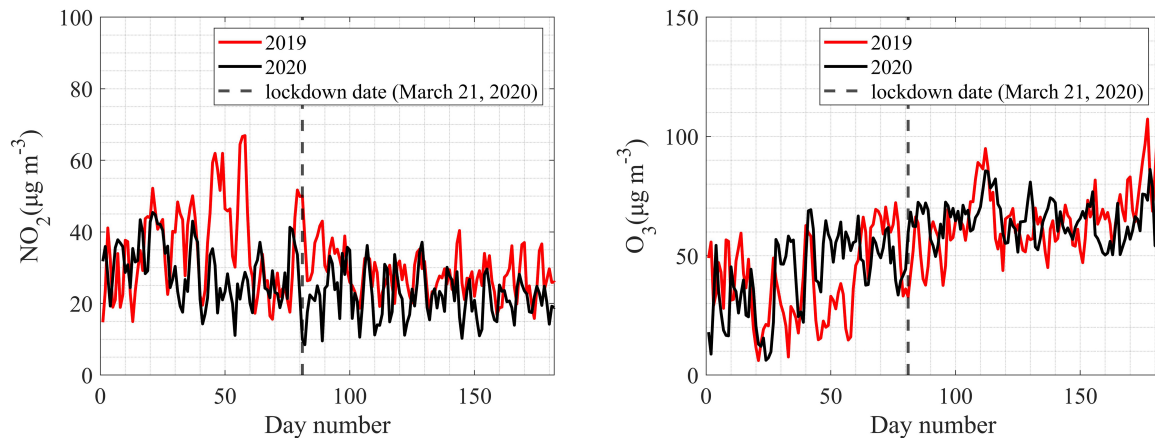

**Figure S5.** Mean of eight metropolitan area's in-situ  $\text{NO}_2$  (left) and  $\text{O}_3$  (right) concentrations in 2019 and 2020.

### Cologne (2019)

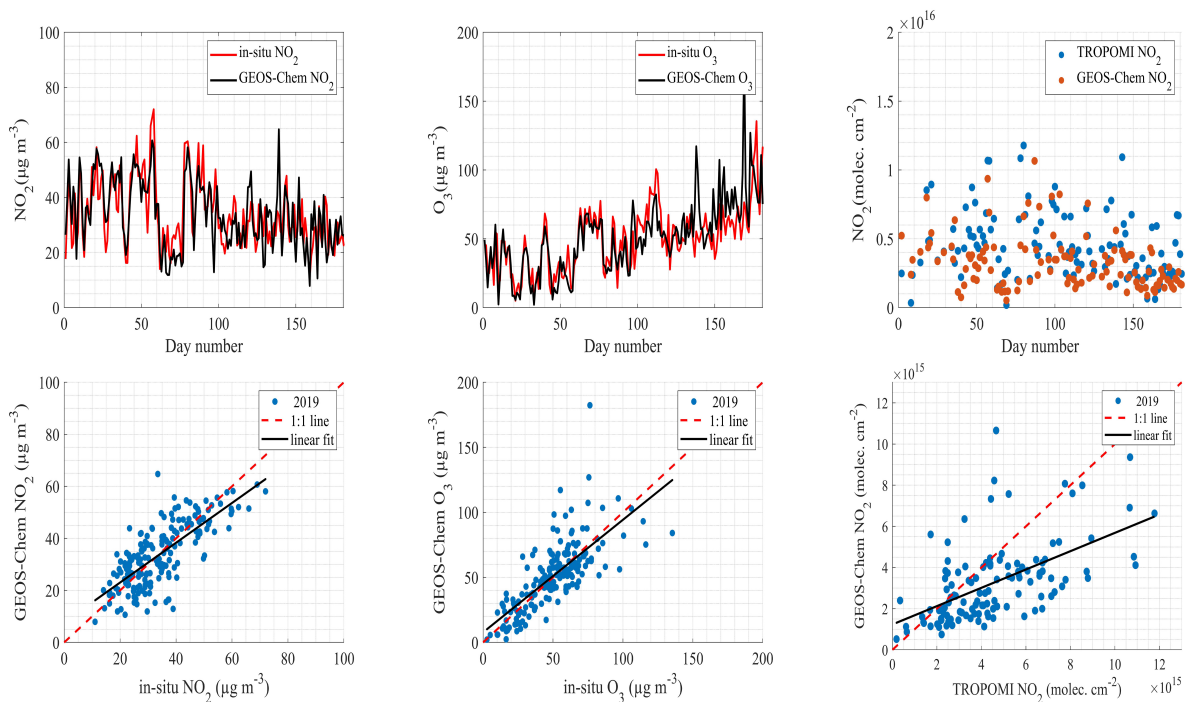

**Figure S6.** Comparison between 2019 GEOS-Chem vs in-situ  $\text{NO}_2$  and  $\text{O}_3$  (left and middle), and 2019 GEOS-Chem vs TROPOMI  $\text{NO}_2$  (right) for Cologne metropolitan area.

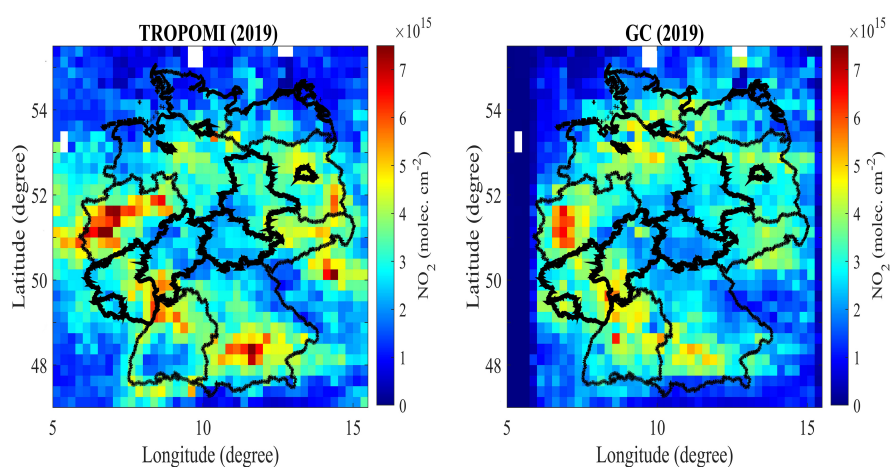

**Figure S7.** Mean TROPOMI NO<sub>2</sub> and GEOS-Chem NO<sub>2</sub> column densities in 2019 (January to June) at national scale.

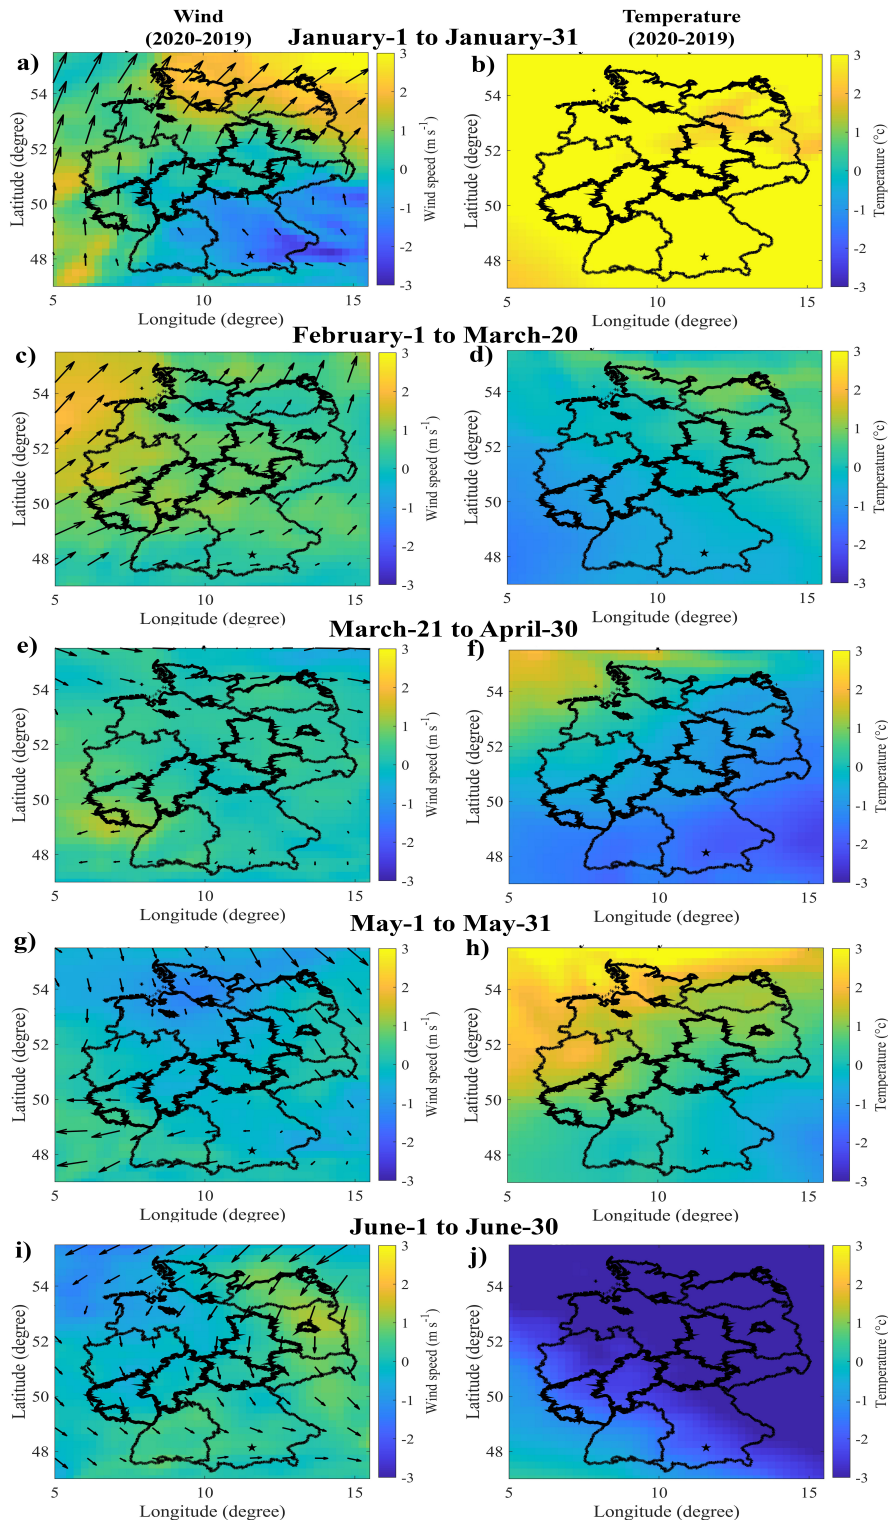

**Figure S8.** The absolute difference in wind condition (left) and temperature (right) between 2020 and 2019 (2020-2019). Wind speed difference and temperature difference is plotted in 0.25-degree grid, whereas, wind direction difference (black arrow) is plotted in 1-degree grid.

## Munich

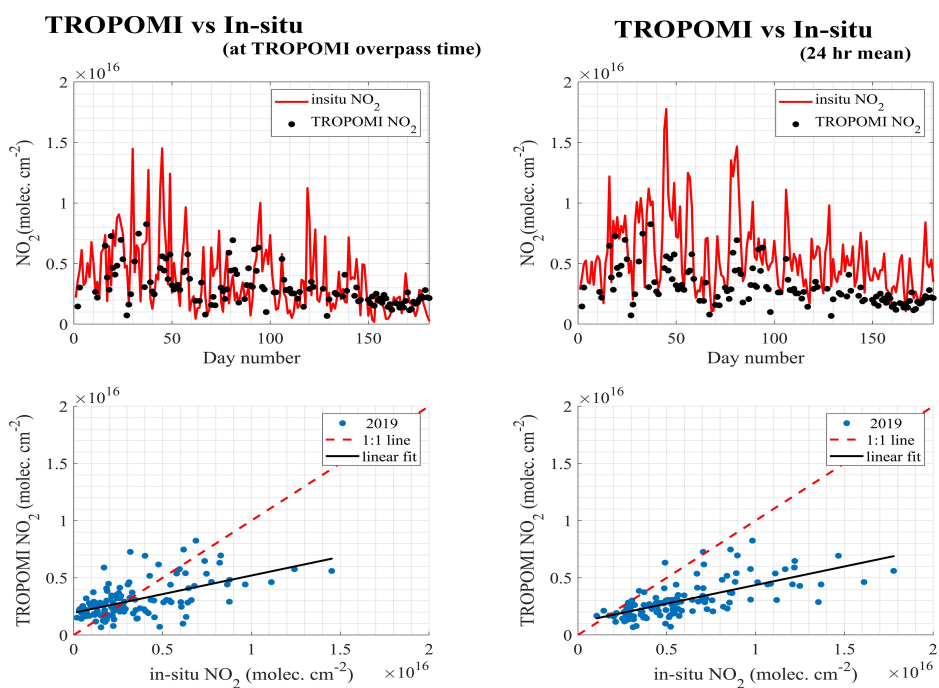

**Figure S9.** Comparison between TROPOMI  $\text{NO}_2$  and in-situ  $\text{NO}_2$  (column converted) at TROPOMI overpass time (left). Comparison between TROPOMI  $\text{NO}_2$  and 24 hour mean in-situ  $\text{NO}_2$  (column converted) (right).

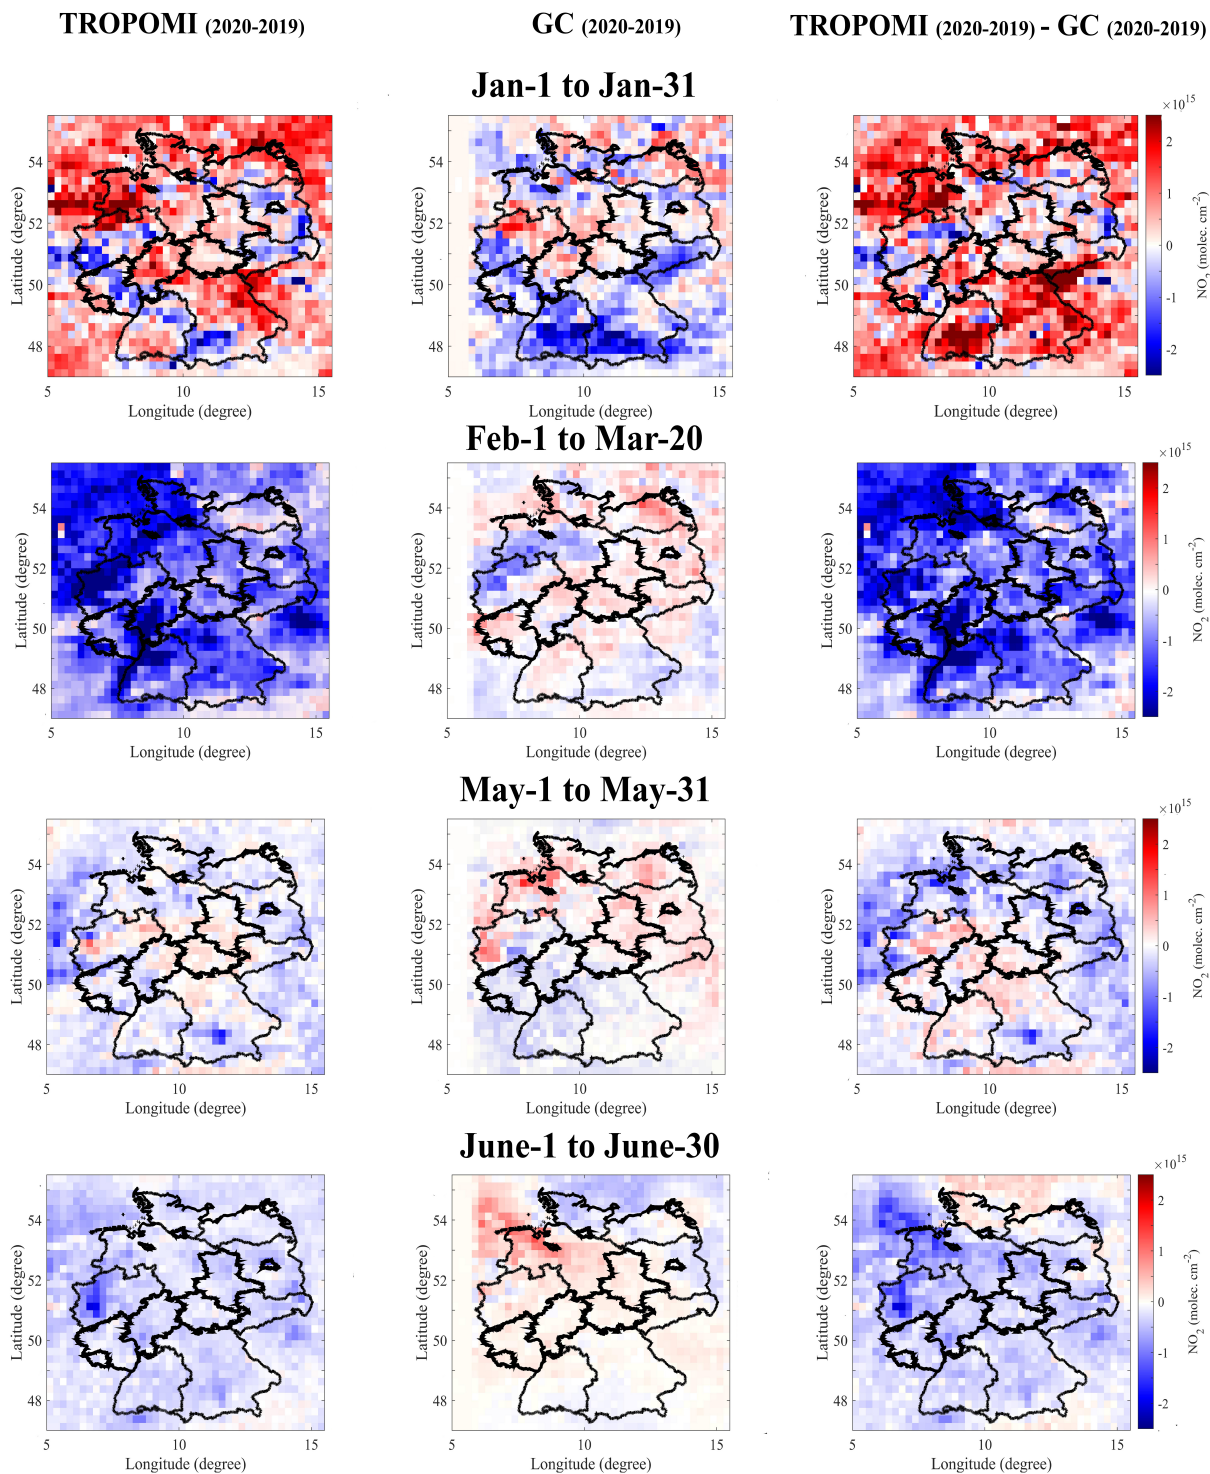

**Figure S10.** Same as Figure 4, but for different time period.



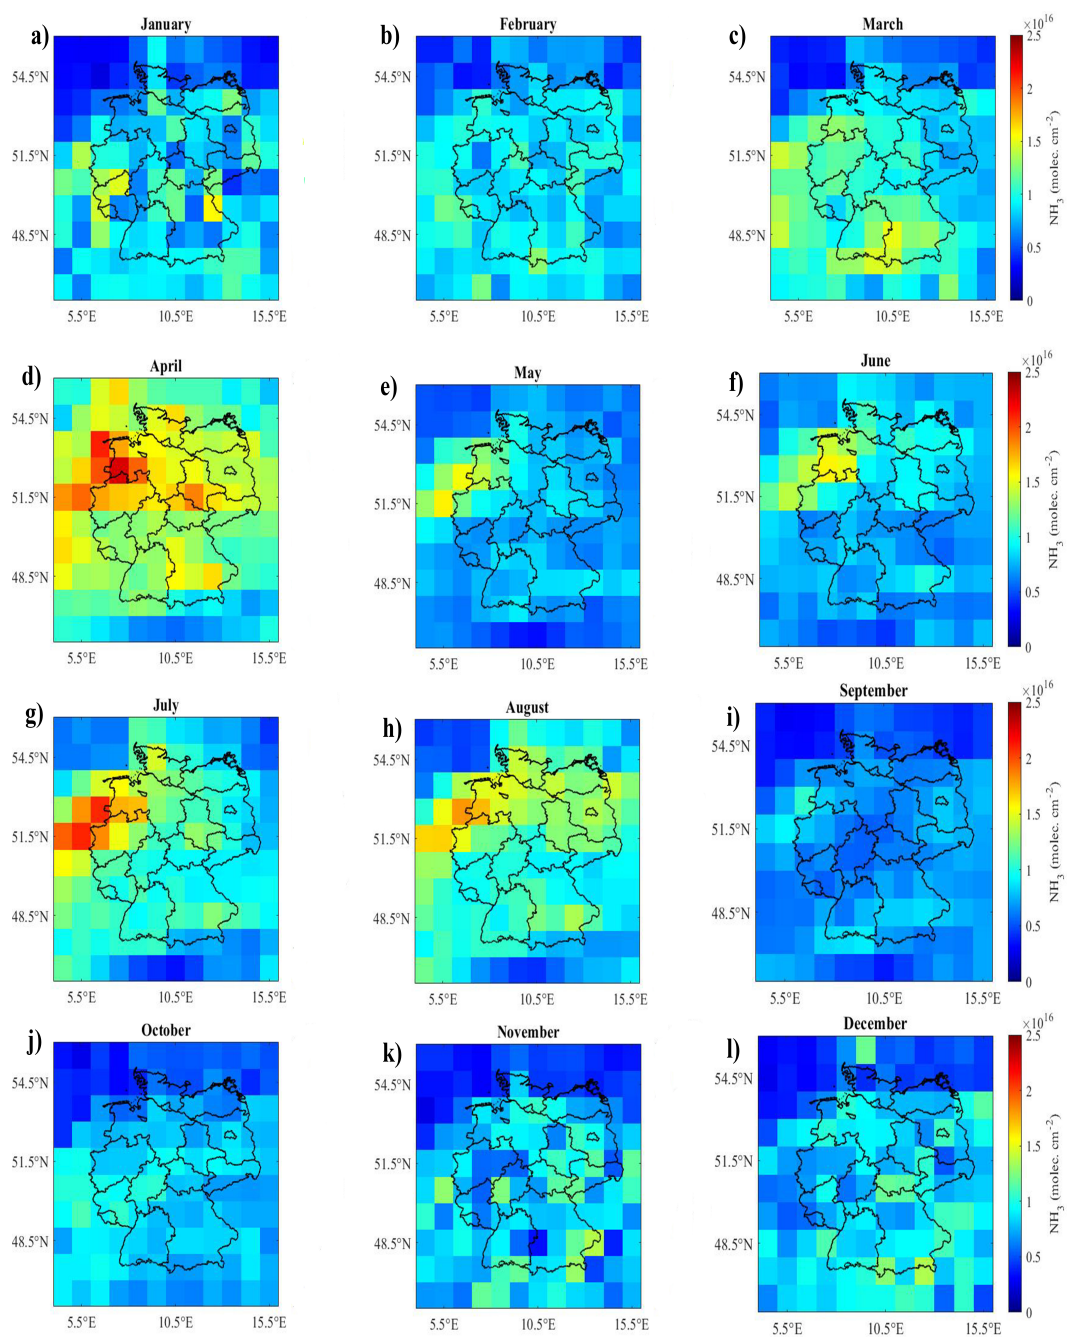

**Figure S11.** Monthly mean  $\text{NH}_3$  total columns measured by IASI for the period from 2018 January to 2020 June.

August 16, 2021, 5:45pm

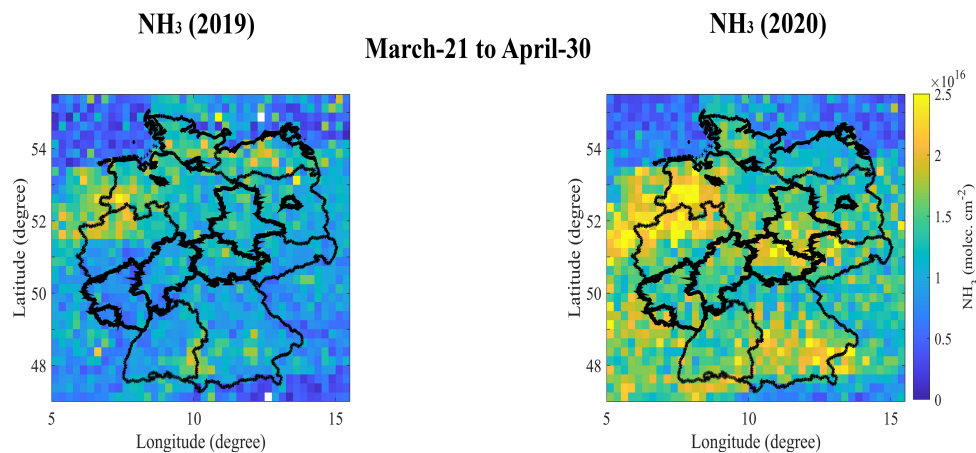

**Figure S12.** Mean NH<sub>3</sub> total column measured by IASI in 2019 (left) and in 2020 (right).

Daily IASI NH<sub>3</sub> measurements gridded at 0.25 degree resolution.

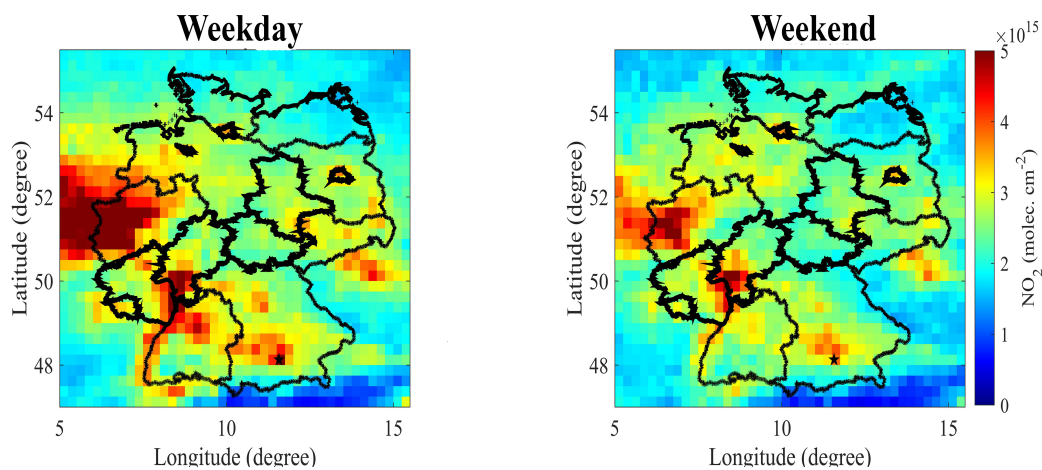

**Figure S13.** Mean of 2019 (from January to June) TROPOMI NO<sub>2</sub> measurements on weekdays and weekends in Germany.

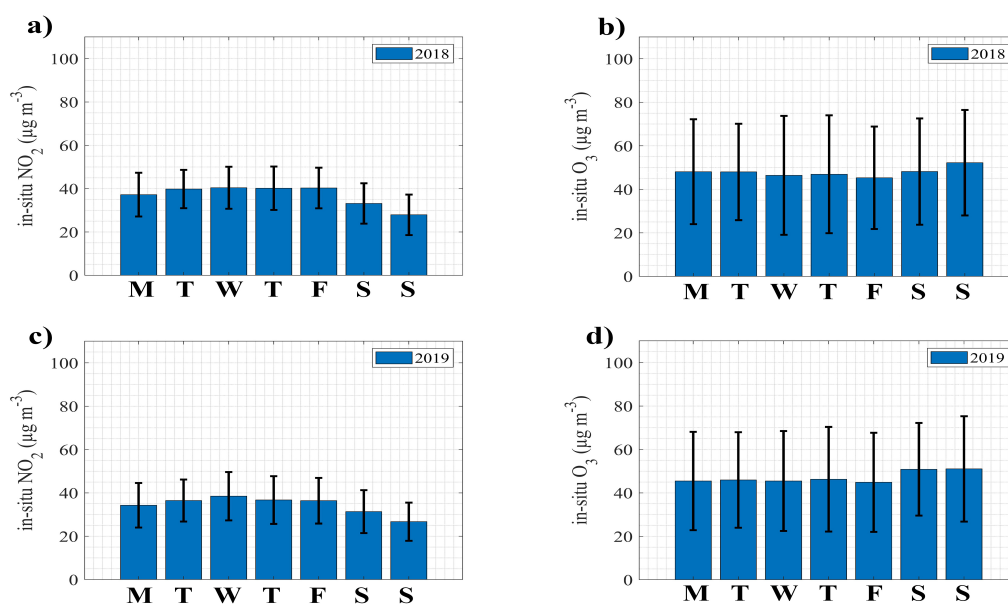

**Figure S14.** Weekly cycle of 2018 and 2019 in-situ NO<sub>2</sub> and O<sub>3</sub> concentration in Munich.

Error bars represent the 1  $\sigma$  of mean of respective days.
